# Supplementary material for: Implementation of a couple-based HIV prevention program: a cluster randomized trial comparing manual versus Web-based approaches
Source: Springer Nature journal article supplement (doi:10.1186/s13012-014-0116-x), 2014-09-10
Supplement: MOESM3 [file 9772762]

**Table 1. Characteristics of HIV Service Agencies by Condition (N=80)#**

|                                                        | Manual-based (Traditional) |         |             | Web-based (Multimedia) |         |              |
|--------------------------------------------------------|----------------------------|---------|-------------|------------------------|---------|--------------|
|                                                        | Mean                       | Median  | Range       | Mean                   | Median  | Range        |
| <b>HIV/STI prevention budget (in dollars)</b>          | 593,372                    | 280,175 | 0-4,000,000 | 1,544,449              | 425,000 | 0-35,000,000 |
| <b>Full-time HIV prevention staff</b>                  | 16                         | 7       | 1-147       | 20                     | 10      | 1-216        |
| <b>Part time HIV prevention staff</b>                  | 2                          | 1       | 0-15        | 3                      | 1       | 0-20         |
| <b>No. of clients receiving HIV prevention</b>         | 7,207                      | 1,192   | 20-81,500   | 3,483                  | 1,200   | 50-40,000    |
| <b>No. of clients receiving multi-session services</b> | 543                        | 126     | 0-4,000     | 472                    | 95      | 0-8,000      |
| <b>% of heterosexual clients</b>                       | 93                         | 80      | 9-95        | 76                     | 80      | 25-95        |
| <b>No. computers available for implementation*</b>     | 8                          | 3       | 1-111       | 8                      | 3       | 0-200        |
| <b>No. DEBIs offered at baseline*</b>                  | 1                          | 1       | 0-7         | 1                      | 2       | 0-6          |

*#Rounded to whole numbers*

*\*individual level data from baseline assessment aggregated by agency*
