# Supplementary material for: Implementation of a couple-based HIV prevention program: a cluster randomized trial comparing manual versus Web-based approaches
Source: Springer Nature journal article supplement (doi:10.1186/s13012-014-0116-x), 2014-09-10
Supplement: MOESM4 [file 9772762]

**Table 2.** Sociodemographic Characteristics for Participants (N=253)

| <b>Sociodemographics</b>        | <b>Manual-based (Traditional) (N=131)</b> |                   | <b>Web-based (Multimedia) (n=122)</b> |                   |
|---------------------------------|-------------------------------------------|-------------------|---------------------------------------|-------------------|
|                                 | <b>Frequency</b>                          | <b>Percentage</b> | <b>Frequency</b>                      | <b>Percentage</b> |
| <b>Sex</b>                      |                                           |                   |                                       |                   |
| Female                          | 89                                        | 67.9              | 92                                    | 75.4              |
| Male                            | 42                                        | 32.1              | 30                                    | 24.6              |
| <b>Age</b>                      |                                           |                   |                                       |                   |
| 18-29                           | 18                                        | 13.7              | 22                                    | 18.0              |
| 30-39                           | 35                                        | 26.7              | 31                                    | 25.4              |
| 40 and above                    | 78                                        | 59.5              | 69                                    | 56.6              |
| <b>Marital status</b>           |                                           |                   |                                       |                   |
| Married                         | 45                                        | 34.4              | 36                                    | 29.5              |
| Separated, Divorced,<br>Widowed | 28                                        | 21.3              | 28                                    | 23.0              |
| Single                          | 58                                        | 44.3              | 58                                    | 47.5              |
| <b>Sexual orientation</b>       |                                           |                   |                                       |                   |
| Heterosexual                    | 110                                       | 84.0              | 99                                    | 81.1              |
| Gay                             | 10                                        | 7.6               | 12                                    | 9.8               |
| Lesbian                         | 6                                         | 4.6               | 6                                     | 4.9               |
| Bisexual                        | 3                                         | 2.3               | 0                                     | 0                 |
| Other                           | 1                                         | 0.8               | 1                                     | .8                |
| <b>Race-Ethnicity</b>           |                                           |                   |                                       |                   |
| African American                | 57                                        | 43.5              | 47                                    | 38.5              |
| Hispanic                        | 45                                        | 34.4              | 47                                    | 38.5              |
| White or Caucasian              | 28                                        | 21.4              | 27                                    | 22.1              |
| Caribbean, West Indian          | 9                                         | 6.9               | 10                                    | 8.2               |
| Asia, SE Asia, Pac Isla.        | 7                                         | 5.3               | 3                                     | 2.5               |
| Amer. Indian/Alaska Nat.        | 1                                         | 0.8               | 1                                     | 0.8               |
| Other.                          | 4                                         | 3.1               | 1                                     | 0.8               |
| Born in 50 U.S. states          | 97                                        | 74.0              | 99                                    | 81.1              |
| <b>Preferred language</b>       |                                           |                   |                                       |                   |
| English                         | 115                                       | 87.8              | 106                                   | 86.9              |
| Spanish                         | 9                                         | 6.9               | 12                                    | 9.8               |
| Other                           | 7                                         | 5.4               | 4                                     | 3.2               |
| <b>Education</b>                |                                           |                   |                                       |                   |
| High School or GED              | 17                                        | 13.0              | 23                                    | 18.9              |
| College or Technical            | 64                                        | 48.9              | 49                                    | 40.2              |
| Graduate school                 | 50                                        | 38.2              | 50                                    | 41.0              |
|                                 | <b>Mean</b>                               | <b>Range</b>      | <b>Mean</b>                           | <b>Range</b>      |
| Yrs in HIV/STI service          | 7.6                                       | .5-13             | 7.1                                   | .5-13             |
| Yrs at agency                   | 4.7                                       | .5-13             | 2.9                                   | .5-13             |
| Computer confidence             | 8.6                                       | 2-10              | 9                                     | 3-10              |
| Browser comfort                 | 8.6                                       | 0-10              | 9                                     | 1-10              |

*A  $\chi^2$  test of independence found no statistically significant ( $p < 0.05$ ) association with condition assignment*
